# Supplementary material for: ER stress-driven unfolded protein response fuels aging-related tumor aggressiveness in gliomas
Source: Frontiers journal article supplement (doi:10.3389/fmolb.2025.1640038), 2025-07-11
Supplement: Data_Sheet_1.pdf [file Data_Sheet_1.pdf]

ER stress-driven unfolded protein response fuels aging-related tumor aggressiveness in gliomas

Supplementary Figures

Figure S1

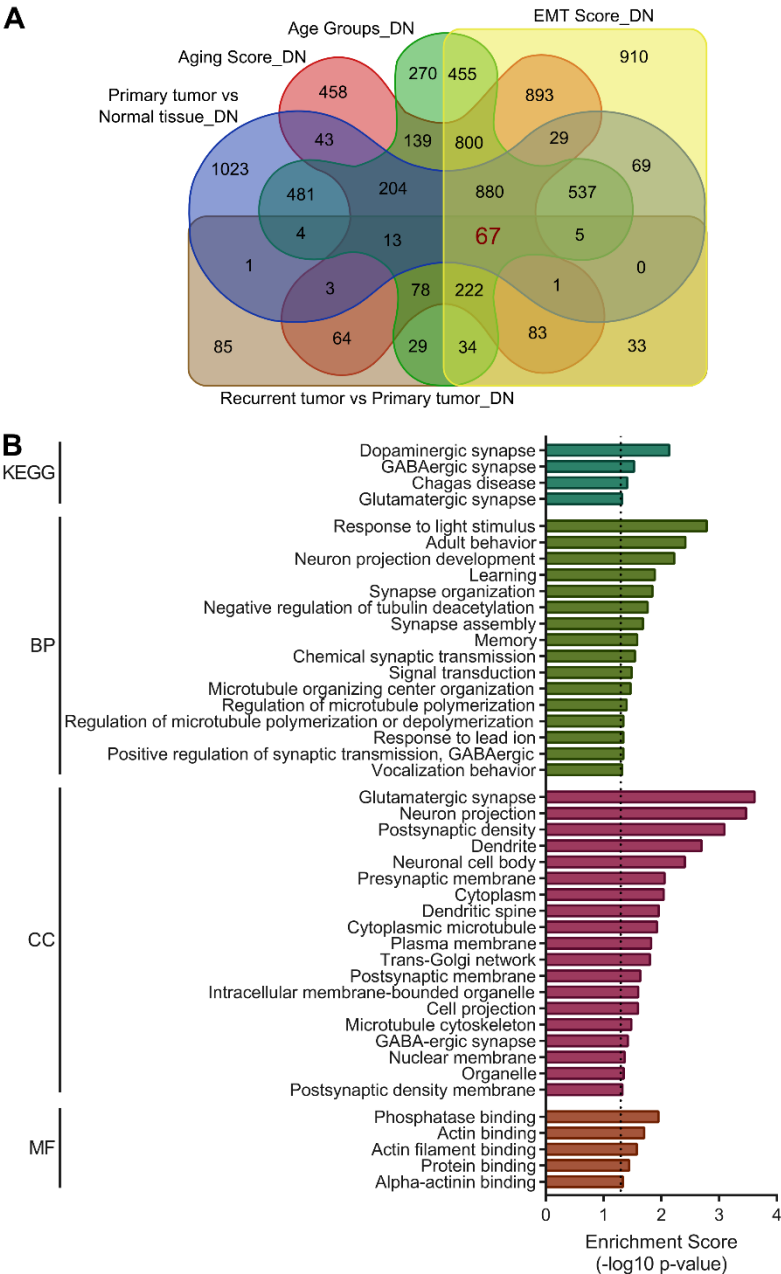

**Supplementary Figure S1: Aging-related tumor aggressiveness-targeted expression analysis identifies brain function-related mechanisms as tumor suppressor pathways in glioma patients.** (A) Venn diagram showing number of aging-related tumor aggressiveness-associated tumor suppressor hubs through pipeline in Figure 1A. (B) Bar-graph showing enrichment score of KEGG pathways, biological processes, cellular compartments and molecular functions in which tumor suppressor hubs, identified in (A), are enriched.

**Figure S2**

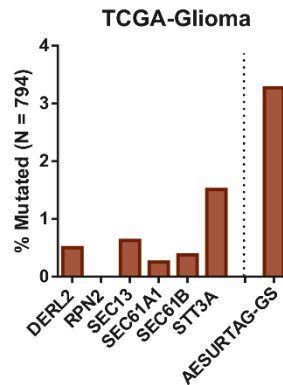

**Supplementary Figure S2. Genes comprising ESURTAG-GS are not mutated in glioma patients.** Bar-graph showing number of glioma patients from TCGA dataset having mutations in genes comprising ESURTAG-GS.

**Figure S3**

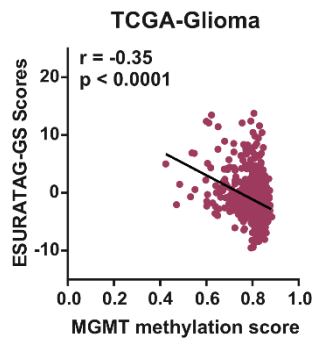

**Supplementary Figure S3. ESURTAG-GS is inversely correlated with MGMT methylation in gliomas.** Scatter-plot showing Pearson correlation of ESURTAG-GS scores with MGMT methylation scores in glioma patients from TCGA dataset.
